# Supplementary material for: Portable through Bottle SORS for the Authentication of Extra Virgin Olive Oil
Source: MDPI journal article supplement (doi:10.3390/app11188347), 2021-09-09
Supplement: s1 [file s1]

Archive with 1 entries (1 files):
- applsci-1345964-supplementary.pdf
